# Supplementary material
Source: PubMed Central journal article supplement (PMC10203963)
Supplement: jamapediatr-e230808-s002.pdf [file jamapediatr-e230808-s002.pdf]

## Data Sharing Statement

Oke. Use and Costs of Instrument-Based Vision Screening for US Children Aged 12 to 36 Months. *JAMA Pediatr.* Published May 22, 2023. doi:10.1001/jamapediatrics.2023.0808

### Data

**Data available:** No
